# Supplementary material for: Glucocorticoid response to both predictable and unpredictable challenges detected as corticosterone metabolites in collared flycatcher droppings
Source: PubMed Central journal article supplement (PMC6301662; doi:10.1371/journal.pone.0209289), 2018-12-20
Supplement: pone.0209289.s002.pdf [file pone.0209289.s002.pdf]

| Random effect<br>V/SD | Fixed effects          | Estimate<br>(SD) | $\chi^2$ | P       | DF |
|-----------------------|------------------------|------------------|----------|---------|----|
| 7.8/2.7               | Stage                  | 5.06(0.72)       | 33.2     | <0.0001 | 1  |
|                       | Ambient<br>temperature | 0.24(0.16)       | 2.16     | 0.14    | 1  |
|                       | Age                    | -0.3(0.4)        | 0.615    | 0.43    | 1  |
