# Supplementary material for: Glucocorticoid response to both predictable and unpredictable challenges detected as corticosterone metabolites in collared flycatcher droppings
Source: PubMed Central journal article supplement (PMC6301662; doi:10.1371/journal.pone.0209289), 2018-12-20
Supplement: pone.0209289.s003.pdf [file pone.0209289.s003.pdf]

| Sex    | Stage      | Factor    | Estimate<br>(SD) | F      | P     | DF |
|--------|------------|-----------|------------------|--------|-------|----|
| Female | Incubation | Air temp. | 0.07(0.03)       | 5.39   | 0.025 | 1  |
|        |            | Age       | -0.07(0.06)      | 1.29   | 0.26  | 1  |
| Female | Feeding    | Air temp. | -0.06(0.04)      | 1.96   | 0.17  | 1  |
|        |            | Age       | -0.11(0.07)      | 2.16   | 0.15  | 1  |
| Male   | Feeding    | Air temp. | -0.002(0.05)     | 0.0021 | 0.96  | 1  |
|        |            | Age       | 0.0066(0.09)     | 0.0058 | 0.93  | 1  |
