# Supplementary material for: Glucocorticoid response to both predictable and unpredictable challenges detected as corticosterone metabolites in collared flycatcher droppings
Source: PubMed Central journal article supplement (PMC6301662; doi:10.1371/journal.pone.0209289), 2018-12-20
Supplement: pone.0209289.s004.pdf [file pone.0209289.s004.pdf]

| Sex    | Stage      | Factor    | Estimate<br>(SD) | F    | P       | DF |
|--------|------------|-----------|------------------|------|---------|----|
| Female | Incubation | BCI       | 0.154(0.07)      | 3.75 | 0.059   | 1  |
|        |            | Age       | -0.07(0.057)     | 1.83 | 0.17    | 1  |
|        |            | Year      | 0.54(0.16)       | 8.07 | 0.0071  | 1  |
| Female | Feeding    | BCI       | -0.055(0.06)     | 0.78 | 0.38    | 1  |
|        |            | Age       | 0.0001(0.06)     | 0    | 0.9     | 1  |
|        |            | Inc. cort | 0.179(0.03)      | 4.9  | <0.0001 | 1  |
|        |            | Year      | -0.137(0.18)     | 0.56 | 0.45    | 1  |
| Male   | Feeding    | BCI       | -0.05(0.07)      | 0.53 | 0.46    | 1  |
|        |            | Age       | 0.02(0.08)       | 0.05 | 0.82    | 1  |
|        |            | Year      | 0.56(0.2)        | 8.01 | 0.0064  | 1  |
